# Supplementary material
Source: publisher site journal article supplement (https://www.dovepress.com/article/407085)
Supplement: Supplementary file 1 [file get_supplementary_file.php]

| **Supplementary Table 1. Stratified analysis of RR from fully adjusted models* (Models 5) for respiratory-cause & cardiovascular-cause according to BMI categories** | | | | | | | |
| --- | --- | --- | --- | --- | --- | --- | --- |
| **Outcome** | **BMI categories Rate Ratios (RR) & (95% CI)** | | | | | | |
|  | **Overall**  **(Un-S)**** | **UW**** | **Normal** | **Pre-O**** | **O I**** | **O II**** | **O III**** |
| **Respiratory-cause** | 3.03  (2.89,3.18) | 3.37  (2.64,4.31) | 3.10  (2.84,3.40) | 2.86  (2.62,3.12) | 3.06  (2.75,3.41) | 3.12  (2.67,3.64) | 2.90  (2.44,3.44) |
|  |  |  |  |  |  |  |  |
| **Cardiovascular-cause** | 0.99  (0.95,1.03) | 0.72  (0.52,0.99) | 0.90  (0.82,0.99) | 0.99  (0.92,1.06) | 1.05  (0.97,1.14) | 1.09  (0.98,1.22) | 0.94  (0.82,1.08) |
| * Fully adjusted models: adjust for age, sex, IMD, smoking status, prior asthma & prior cardiovascular conditions.  ** Abbreviations:  Un-S: Unstratified Rate Ratios (RR)  UW: Underweight  Pre-O: Pre-obesity  O I: Obesity Class I  O II: Obesity Class II  O III: Obesity Class III | | | | | | | |
